# Supplementary material
Source: ML conference proceedings conference paper supplement (https://proceedings.mlr.press/v130/bao21b.html)
Supplement: Supplementary file 1 [file bao21b-supp.pdf]

# Fenchel-Young Losses with Skewed Entropies for Class-posterior Probability Estimation (Supplementary Material)

## A Proofs

### A.1 Proof of Lemma 2

*Proof.* It is easy to show  $\eta \in \text{Im}(F)$  for all  $\eta \in (0, 1)$ . Indeed, this is an immediate corollary of the intermediate value theorem (Apostol, 1991) over an open interval. Note that  $F(\theta) \rightarrow 1$  as  $\theta \rightarrow \infty$  and  $F(\theta) \rightarrow 0$  as  $\theta \rightarrow -\infty$ .

We show  $F$  is strictly increasing over  $(\underline{\theta}_F, \bar{\theta}_F)$ . Fix  $\tilde{\theta} \in (\underline{\theta}_F, \bar{\theta}_F)$ . Let  $t \in (0, 1)$  be a constant such that  $\tilde{\theta} = t\underline{\theta}_F + (1-t)\bar{\theta}_F$ . If  $\underline{\theta}_F$  is  $-\infty$ , then we define by  $\tilde{\theta} = t\underline{C}_F + (1-t)\bar{\theta}_F$  for small enough  $\underline{C}_F$ . Subsequently, we consistently write  $\underline{C}_F$  instead of  $\underline{\theta}_F$  regardless of the boundedness of  $\underline{\theta}_F$ . We treat the case where  $\bar{\theta}_F$  is  $\infty$  in the same manner by large enough  $\bar{C}_F$ . Since  $\text{supp}(F)$  is convex and  $\underline{C}_F, \bar{C}_F \in \text{supp}(F)$ ,  $\tilde{\theta} \in \text{supp}(F)$ . This implies that  $F(\tilde{\theta} + \varepsilon) > F(\tilde{\theta} - \varepsilon)$  for all  $\varepsilon > 0$ . It immediately follows that  $F$  is strictly increasing over  $(\underline{\theta}_F, \bar{\theta}_F)$ .  $\square$

### A.2 Proof of Proposition 4

In order to show Proposition 4, we need the following lemma.

**Lemma 8.**  $\ell_\Omega$  has the PSM if and only if there exists  $m > 0$  such that  $-m \in \partial\Omega(0)$  and  $\partial\Omega(1) = \emptyset$ .

*Proof of Lemma 8.* The proof is a simple corollary of Blondel et al. (2020, Proposition 5). We provide the proof here for the completeness.

[ $\Rightarrow$ ] If  $\ell_\Omega$  has the PSM, there exists  $m > 0$  such that  $-\theta \geq m$  implies  $\ell_\Omega(\theta; 0) = 0$  (part (a)). Let us fix  $\theta = -m$ , then  $\ell_\Omega(\theta; 0) = 0$ . By Proposition 1, we have  $\theta \in \partial\Omega(0)$ . On the other hand, if  $\ell_\Omega$  has the PSM, for all  $m > 0$ , there exists  $\theta > m$  such that  $\ell(\theta; 1) > 0$  (part (b)). By Proposition 1, we have  $\theta \notin \partial\Omega(1)$  for such  $\theta$ . If  $\ell_\Omega(\cdot; 1)$  is non-increasing, then we know  $\ell(m; 1) > \ell(\theta; 1)$  implying that  $m \notin \partial\Omega(1)$ . We can confirm  $\ell_\Omega(\cdot; 1)$  is non-increasing because  $\nabla_\theta \ell_\Omega(\theta; 1) = F(\theta) - 1 \leq 0$ , which holds from Assumption A and Proposition 1. Hence, it holds that  $m \notin \partial\Omega(1)$  for all  $m > 0$ , which is equivalent to  $\partial\Omega(1) = \emptyset$ .

[ $\Leftarrow$ ] First, fix  $\theta \leq -m$ . Since  $\Omega$  is convex, we have  $s \in \partial\Omega(0)$  for all  $s \leq -m$ , implying that  $\theta \in \partial\Omega(0)$ . By Proposition 1,  $\ell(\theta; 0) = 0$  (part (a)). Next, for a given  $m > 0$ , fix an arbitrary  $\theta > m$ . Since  $\partial\Omega(1) = \emptyset$ ,  $\theta \notin \partial\Omega(1)$ , implying  $\ell_\Omega(\theta; 1) > 0$  by Proposition 1 (part (b)).  $\square$

We are now ready to show Proposition 4.

*Proof of Proposition 4.* Part (a)  $\implies$  Part (b): Lemma 3 ensures the differentiability of  $\Omega$  hence  $F = \nabla\Omega^*$  from Figure 1. Our goal is to show  $\overline{\nabla\Omega^*(\mathbb{R})} = [0, 1)$ . To do so, we need to show

1. For all  $\eta \in [0, 1)$ , there exists  $\theta \in \mathbb{R}$  such that  $\eta \in \arg \min_{q \in [0, 1]} \Omega(q) - \theta q$ . Since the Lagrangian associated this optimization problem is  $\mathcal{L}(q, \mu, \lambda) \stackrel{\text{def}}{=} \Omega(q) - \theta q - \mu q + \lambda(q - 1)$ , where  $\mu$  and  $\lambda$  are KKT multipliers, the KKT conditions are

- $0 \in \partial_q \mathcal{L}(\eta, \mu, \lambda) = \partial\Omega(\eta) - \theta - \mu + \lambda$ ,
- $0 \leq \eta \leq 1$ ,
- $\mu\eta = 0$  and  $\mu \geq 0$ ,
- $\lambda(\eta - 1) = 0$  and  $\lambda \geq 0$ .

By substituting  $\mu = \lambda = 0$ , we obtain  $\theta \in \partial\Omega(\eta)$ . Since  $\partial\Omega(\eta) \neq \emptyset$  for  $\eta \in [0, 1)$  is assumed, this  $\theta$  is a feasible solution. Hence, such  $\theta$  does exist.

2. For all  $\theta \in \mathbb{R}$ ,  $1 \notin \arg \min_{q \in [0,1]} \Omega(q) - \theta q$ . In the same way, we have the KKT conditions such that  $0 \in \partial_q \mathcal{L}(1, 0, \lambda) = \partial \Omega(1) - \theta + \lambda$  and  $\lambda \geq 0$ . Since  $\partial \Omega(1) = \emptyset$ , such  $\theta$  does not exist.

Part (b)  $\implies$  Part (a): The assumption implies  $\partial \Omega^*(\mathbb{R}) = [0, 1)$ , meaning that for all  $\eta \in [0, 1)$ , the following two facts hold.

1. There exists  $\theta \in \mathbb{R}$  such that  $\eta \in \partial \Omega^*(\theta)$ . By Danskin's theorem, this implies  $\theta \in \partial \Omega(\eta)$ , which concludes that  $\partial \Omega(\eta) \neq \emptyset$ .
2. There does not exist  $\theta \in \mathbb{R}$  such that  $1 \in \partial \Omega^*(\theta)$ . In the same way, this implies that  $\partial \Omega(1) = \emptyset$ .

Part (a)  $\implies$  Part (c): By Lemma 8, we need to show that there exists  $m > 0$  such that  $-m \in \partial \Omega(0)$  and  $\partial \Omega(1) = \emptyset$ , where the latter immediately follows from the assumption. For the latter, we first prove by contradiction that there exists  $\theta \in \partial \Omega(0)$  such that  $\theta < 0$ . Assume that for all  $\eta' \in [0, 1]$  and  $g \geq 0$ ,  $\Omega(\eta') \geq \Omega(0) + g\eta'$ . It is equivalent to  $\Omega(\eta') \geq g\eta'$  because  $\Omega(0) = 0$  by the construction of the induced entropy (4). Since we can take arbitrary  $g \geq 0$ , it implies  $\Omega(\eta') = \infty$ , contradicting with  $\text{dom}(\Omega) = [0, 1]$ . Hence, there exists  $\theta \in \partial \Omega(0)$  such that  $\theta < 0$ . By Lemma 8, it is concluded that  $\ell_\Omega$  has the PSM.

Part (c)  $\implies$  Part (a): Our goal is to show that there exists  $g \in \mathbb{R}$  such that  $\Omega(\eta') \geq \Omega(\eta) + g(\eta' - \eta)$  for all  $\eta' \in [0, 1]$  ( $\partial \Omega(1) = \emptyset$  immediately follows from the PSM). By Lemma 8, there exists  $\theta \in \partial \Omega(0)$  such that  $\theta < 0$ . To show the above claim by contradiction, assume that for all  $g \in \mathbb{R}$ , there exists  $\eta' \in [0, 1]$  such that  $\Omega(\eta') < \Omega(\eta) + g(\eta' - \eta)$ . Since  $\Omega(\eta') \geq \Omega(0) + \theta(\eta' - 0) = \theta\eta'$  from  $\theta \in \partial \Omega(0)$ , we have  $\Omega(\eta) > g\eta + (\theta - g)\eta'$ . Since  $\eta' = \eta$  contradicts with the assumption  $\Omega(\eta') < \Omega(\eta) + g(\eta' - \eta) = \Omega(\eta)$ , we may naturally assume  $\eta' \neq \eta$ . Then,  $\Omega(\eta) > \theta\eta' - g(\eta' - \eta)$  for all  $g \in \mathbb{R}$  implies that  $\Omega(\eta) = \infty$ , contradicting with  $\text{dom}(\Omega) = [0, 1]$ . Hence, we have  $\partial \Omega(\eta) \neq \emptyset$ .  $\square$

### A.3 Proof of Proposition 5

*Proof.* By Proposition 4 (part (a)), there exists  $\theta \in \mathbb{R}$  such that  $\theta \in \partial \Omega(0)$  if  $\ell_\Omega$  has PSM. That is, for some  $\theta \in \mathbb{R}$ ,

$$\begin{aligned} \theta \in \partial \Omega(0) &\iff \Omega(\eta) \geq \Omega(0) + \theta(\eta - 0) && \forall \eta \in [0, 1], \\ &\iff \theta \leq \frac{\Omega(\eta)}{\eta} && \forall \eta \in (0, 1]. \end{aligned}$$

Note that Lemma 3 ensures the differentiability of  $\Omega$ . The margin is the smallest  $-\theta$  satisfying the above, which is

$$\begin{aligned} \sup_{\eta \in (0,1]} -\frac{\Omega(\eta)}{\eta} &= -\lim_{\eta \searrow 0} \frac{\Omega(\eta)}{\eta} && \triangleleft \Omega(\eta)/\eta \text{ is non-decreasing} \\ &= -\lim_{\eta \searrow 0} \frac{\nabla \Omega(\eta)}{1} && \triangleleft \text{L'Hôpital's rule} \\ &= -\nabla \Omega(0) \\ &= -F^{-1}(0) \\ &= -\inf \text{supp}(F). \end{aligned}$$

$\Omega(\eta)/\eta$  is non-decreasing because

$$\begin{aligned} \frac{d\left(\frac{\Omega(\eta)}{\eta}\right)}{d\eta} &= \frac{\eta \nabla \Omega(\eta) - \Omega(\eta)}{\eta^2} \\ &= \frac{\Omega^*(\nabla \Omega(\eta))}{\eta^2} && \triangleleft \text{Danskin's theorem} \\ &\geq 0. && \triangleleft F \geq 0 \end{aligned}$$

$\square$

## B Derivations

### B.1 GEV-Fenchel-Young Loss

Recall that the entropy  $\Omega$  and its dual  $\Omega^*$  is given as

$$\Omega(\eta) = \int_0^\eta F_\xi^{-1}(q) dq, \quad \Omega^*(\theta) = \int_{-\infty}^\theta F_\xi(s) ds.$$

In this section, we derive closed-forms of  $\Omega$  and  $\Omega^*$  depending on the value of  $\xi$ .

**(Case A) When  $\xi = 0$ :** The CDF and its inverse are

$$F_\xi(\theta) = \exp(-\exp(-\theta)), \quad F_\xi^{-1}(\eta) = -\log(-\log(\eta)).$$

Then, the dual entropy is calculated as

$$\Omega^*(\theta) = \int_{-\infty}^\theta \exp(-\exp(-s)) ds = \int_{-\infty}^{e^{-\theta}} -\frac{e^{-t}}{t} dt = \int_{e^{-\theta}}^\infty \frac{e^{-t}}{t} dt = \Gamma(0, \exp(-\theta)),$$

where change of the variable  $t \stackrel{\text{def}}{=} \exp(-s)$  is applied at the second identity, and the last identity follows from the definition of the upper incomplete gamma function

$$\Gamma(a, x) = \int_x^\infty t^{a-1} e^{-t} dt.$$

The entropy is calculated as

$$\begin{aligned} \Omega(\eta) &= \int_0^\eta -\log(-\log q) dq \\ &= [-q \log(-\log q)]_0^\eta - \int_0^\eta -q \cdot \frac{1}{-\log q} \cdot \frac{-1}{q} dq && \triangleleft \text{integral by parts} \\ &= [-q \log(-\log q)]_0^\eta + \int_0^\eta (\log q)^{-1} dq \\ &= -\eta \log(-\log \eta) + \int_0^\eta (\log q)^{-1} dq && \triangleleft -q \log(-\log q) \xrightarrow{q \rightarrow 0} 0 \\ &= -\eta \log(-\log \eta) + \int_\infty^{-\log \eta} \frac{1}{-t} \cdot (-e^{-t}) dt && \triangleleft \text{change of variable } q \stackrel{\text{def}}{=} e^{-t} \\ &= -\eta \log(-\log \eta) - \int_{-\log \eta}^\infty t^{-1} e^{-t} dt \\ &= -\eta \log(-\log \eta) - \Gamma(0, -\log \eta) \\ &= -\eta \log(-\log \eta) + \text{Ei}(\log \eta). \end{aligned}$$

**(Case B) When  $\xi > 0$ :** The CDF and its inverse are

$$F_\xi(\theta) = \begin{cases} 0 & \text{if } \theta < -1/\xi, \\ \exp(-(1 + \xi\theta)^{-1/\xi}) & \text{if } \theta \geq -1/\xi. \end{cases}, \quad F_\xi^{-1}(\eta) = \frac{1}{\xi} \left( \frac{1}{(-\log \eta)^\xi} - 1 \right).$$

The entropy is calculated as

$$\begin{aligned} \Omega(\eta) &= \int_0^\eta \frac{1}{\xi} \left( \frac{1}{(-\log q)^\xi} - 1 \right) dq \\ &= \frac{1}{\xi} \int_\infty^{-\log \eta} t^{-\xi} \cdot (-e^{-t}) dt - \frac{1}{\xi} \eta && \triangleleft \text{change of variable } q \stackrel{\text{def}}{=} e^{-t} \\ &= \frac{1}{\xi} \int_{-\log \eta}^\infty t^{-\xi} e^{-t} dt - \frac{1}{\xi} \eta \\ &= \frac{1}{\xi} \{ \Gamma(1 - \xi, -\log \eta) - \eta \}. \end{aligned}$$

Note that  $\Omega(1)$  is defined only for  $0 < \xi < 1$  otherwise it diverges because the recurrence relationship  $\Gamma(s+1, x) = s\Gamma(s, x) + x^s e^{-x}$  can be used only when  $s > 0$  or  $x > 0$ .

In order to calculate the dual entropy, we divide the cases. When  $\theta \geq -1/\xi$ ,

$$\begin{aligned}\Omega^*(\theta) &= \int_{-1/\xi}^{\theta} \exp(-(1 + \xi s)^{-1/\xi}) ds \\ &= \int_{\infty}^{(1+\xi\theta)^{-1/\xi}} -\frac{e^{-t}}{t^{1+\xi}} dt && \triangleleft \text{change of variable } t \stackrel{\text{def}}{=} (1 + \xi s)^{-1/\xi} \\ &= \int_{(1+\xi\theta)^{-1/\xi}}^{\infty} t^{-\xi-1} e^{-t} dt \\ &= \Gamma(-\xi, (1 + \xi\theta)^{-1/\xi}).\end{aligned}$$

When  $\theta < -1/\xi$ ,

$$\Omega^*(\theta) = \lim_{\theta \searrow -1/\xi} \Gamma(-\xi, (1 + \xi\theta)^{-1/\xi}) = 0.$$

**(Case C) When  $\xi < 0$ :** The CDF and its inverse are

$$F_{\xi}(\theta) = \begin{cases} 1 & \text{if } \theta > -1/\xi, \\ \exp(-(1 + \xi\theta)^{-1/\xi}) & \text{if } \theta \leq -1/\xi, \end{cases}, \quad F_{\xi}^{-1}(\eta) = \frac{1}{\xi} \left( \frac{1}{(-\log \eta)^{\xi}} - 1 \right).$$

The entropy is the same as when  $\xi > 0$ :  $\Omega(\eta) = \frac{1}{\xi} \{\Gamma(1 - \xi, -\log \eta) - \eta\}$ . In order to calculate the dual entropy, we divide the cases. When  $\theta \leq -1/\xi$ ,

$$\begin{aligned}\Omega^*(\theta) &= \int_{-\infty}^{\theta} \exp(-(1 + \xi s)^{-1/\xi}) ds \\ &= \int_{\infty}^{(1+\xi\theta)^{-1/\xi}} -\frac{e^{-t}}{t^{1+\xi}} dt && \triangleleft \text{change of variable } t \stackrel{\text{def}}{=} (1 + \xi s)^{-1/\xi} \\ &= \int_{(1+\xi\theta)^{-1/\xi}}^{\infty} t^{-\xi-1} e^{-t} dt \\ &= \Gamma(-\xi, (1 + \xi\theta)^{-1/\xi}),\end{aligned}$$

When  $\theta > -1/\xi$ ,

$$\begin{aligned}\Omega^*(\theta) &= \underbrace{\int_{-\infty}^{-1/\xi} \exp(-(1 + \xi s)^{-1/\xi}) ds}_{=\Gamma(-\xi, 0)=\Gamma(-\xi)} + \int_{-1/\xi}^{\theta} ds \\ &= \Gamma(-\xi) + [s]_{-1/\xi}^{\theta} \\ &= \theta + \Gamma(-\xi) + \xi^{-1},\end{aligned}$$

where  $\Gamma(a) \stackrel{\text{def}}{=} \Gamma(a, 0)$  is the (complete) gamma function.

## B.2 GEV-Canonical Loss

The canonical proper losses associated with the GEV link are shown in Table 5. We will show their derivations subsequently.

As a corollary of Theorem 6, the canonical proper loss with a link  $\psi$  given a weight function  $w : (0, 1) \rightarrow \mathbb{R}_{\geq 0}$  such that  $w = \nabla\psi$  is given as

$$\ell(\hat{\eta}; 1) = \int_{\hat{\eta}}^1 (1 - q)w(q) dq, \quad \ell(\hat{\eta}; 0) = \int_0^{\hat{\eta}} qw(q) dq.$$

**Table 5:** GEV canonical proper losses. The explicit form of  $\Omega$  is provided in Table 1.

| $\xi$         | $\ell_{F_\xi^{-1}}(\theta; 1)$                                                  | $\ell_{F_\xi^{-1}}(\theta; 0)$             |
|---------------|---------------------------------------------------------------------------------|--------------------------------------------|
| $\xi < 0$     | $\Gamma(-\xi, (1 + \xi\theta)_+^{-1/\xi}) - \min\{\theta, -1/\xi\} + \Omega(1)$ | $\Gamma(-\xi, (1 + \xi\theta)_+^{-1/\xi})$ |
| $\xi = 0$     | $\Gamma(0, e^{-\theta}) - \theta + \Omega(1)$                                   | $\Gamma(0, e^{-\theta})$                   |
| $0 < \xi < 1$ | $\Gamma(-\xi, (1 + \xi\theta)_+^{-1/\xi}) - \max\{\theta, -1/\xi\} + \Omega(1)$ | $\Gamma(-\xi, (1 + \xi\theta)_+^{-1/\xi})$ |

In addition, we have a relationship between a weight function and partial losses such that

$$w(\eta) = \nabla_\eta \ell(\eta; 0) - \nabla_\eta \ell(\eta; 1).$$

In this section, we derive the canonical proper loss and composite loss.

The link function of the GEV-canonical loss is defined as

$$\psi(\eta) = F_\xi^{-1}(\eta) = \begin{cases} -\log(-\log \eta) & \text{if } \xi = 0, \\ \frac{1}{\xi} \left( \frac{1}{(-\log \eta)^\xi} - 1 \right) & \text{if } \xi \neq 0, \end{cases}$$

and the associated canonical weight function for  $\xi \neq 0$  is

$$w(\eta) = \frac{d\psi(\eta)}{d\eta} = \frac{1}{\eta(-\log \eta)^{1+\xi}},$$

which is general enough to cover the case  $\xi = 0$ ,  $w(\eta) = -1/(\eta \log \eta)$ .

First, we derive the canonical proper loss. The partial loss for  $y = 0$  is

$$\begin{aligned} \ell(\hat{\eta}; 0) &= \int_0^{\hat{\eta}} \frac{1}{(-\log q)^{1+\xi}} dq \\ &= \int_\infty^{-\log \hat{\eta}} \frac{-e^{-t}}{t^{1+\xi}} dt && \triangleleft \text{change of variable } t \stackrel{\text{def}}{=} -\log q \\ &= \int_{-\log \hat{\eta}}^\infty t^{-\xi-1} e^{-t} dt \\ &= \Gamma(-\xi, -\log \hat{\eta}). \end{aligned}$$

The partial loss for  $y = 1$  is derived from the relationship  $w(\eta) = \nabla_\eta \ell(\eta; 0) - \nabla_\eta \ell(\eta; 1)$ . By integrating the both sides, we have  $\psi(\eta) = \ell(\eta; 0) - \ell(\eta; 1) + C$ , where  $C$  is an integration constant. Hence,

$$\begin{aligned} \ell(\hat{\eta}; 1) &= \ell(\hat{\eta}; 0) - \psi(\hat{\eta}) + C \\ &= C + \begin{cases} \Gamma(0, -\log \hat{\eta}) + \log(-\log \hat{\eta}) & \text{if } \xi = 0, \\ \Gamma(-\xi, -\log \hat{\eta}) - \frac{1}{\xi} \left( \frac{1}{(-\log \hat{\eta})^\xi} - 1 \right) & \text{if } \xi \neq 0. \end{cases} \end{aligned}$$

The integration constant  $C$  can be determined with the constraint  $\ell(1; 1) = \lim_{\eta \nearrow 1} \int_\eta^1 qw(q) dq = 0$ . When  $\xi \neq 0$

and  $\xi < 1$ ,

$$\begin{aligned}
 C &= - \lim_{\eta \nearrow 1} \left\{ \Gamma(-\xi, -\log \eta) - \frac{1}{\xi} \left( \frac{1}{(-\log \eta)^\xi} - 1 \right) \right\} \\
 &\stackrel{(\clubsuit)}{=} - \lim_{\eta \nearrow 1} \left\{ \frac{1}{\xi} \left( -\Gamma(1-\xi, -\log \eta) + \frac{\eta}{(-\log \eta)^\xi} \right) - \frac{1}{\xi} \left( \frac{1}{(-\log \eta)^\xi} - 1 \right) \right\} \\
 &= \lim_{\eta \nearrow 1} \left\{ \underbrace{\frac{1}{\xi} (\Gamma(1-\xi, -\log \eta) - p)}_{= \Omega(\eta) \text{ from §B.1}} + \frac{1}{\xi} \cdot \frac{1-\eta}{(-\log \eta)^\xi} - \underbrace{\frac{1-\eta}{\xi}}_{\rightarrow 0} \right\} \\
 &= \Omega(1) + \frac{1}{\xi} \lim_{\eta \nearrow 1} \frac{1-\eta}{(-\log \eta)^\xi} \\
 &= \Omega(1) + \frac{1}{\xi} \lim_{\eta \nearrow 1} \frac{-1}{\xi (-\log \eta)^{\xi-1} \cdot (-\frac{1}{\eta})} \quad \triangleleft \text{L'Hôpital's rule} \\
 &= \Omega(1) + \frac{1}{\xi^2} \lim_{\eta \nearrow 1} p (-\log \eta)^{1-\xi} \\
 &= \Omega(1), \quad \triangleleft x^{1-\xi} \xrightarrow{x \rightarrow 0} 0
 \end{aligned}$$

where we used the recurrence relationship  $\Gamma(s+1, x) = s\Gamma(s, x) + x^s e^{-x}$  at the identity  $(\clubsuit)$ . It is elementary to check that  $C = \Omega(1)$  for  $\xi = 0$ . Note that the integration constant  $C$  diverges for  $\xi \geq 1$  hence the partial loss  $\ell(\hat{\eta}; 1)$  cannot be defined.

Then, we derive the composite loss:  $\ell_{F_\xi^{-1}}(\theta; y) = \ell(F_\xi(\theta); y)$ .

**(Case A) When  $\xi = 0$ :** Since the inverse link function (CDF) is  $F_\xi(\theta) = \exp(-\exp(-\theta))$ , the composite loss is

$$\ell_{F_\xi^{-1}}(\theta; y) = \begin{cases} \Gamma(0, e^{-\theta}) - \theta + \Omega(1) & \text{if } y = 1, \\ \Gamma(0, e^{-\theta}) & \text{if } y = 0. \end{cases}$$

**(Case B) When  $0 < \xi < 1$ :** Since the inverse link function (CDF) is

$$F_\xi(\theta) = \begin{cases} 0 & \text{if } \theta < -1/\xi, \\ \exp(-(1 + \xi\theta)^{-1/\xi}) & \text{if } \theta \geq -1/\xi, \end{cases}$$

we have  $F_\xi^{-1}(F_\xi(\theta)) = \max\{\theta, -1/\xi\}$ <sup>a</sup>. Hence,

$$\ell_{F_\xi^{-1}}(\theta; y) = \begin{cases} \Gamma(-\xi, (1 + \xi\theta)_+^{-1/\xi}) - \max\{\theta, -1/\xi\} + \Omega(1) & \text{if } y = 1, \\ \Gamma(-\xi, (1 + \xi\theta)_+^{-1/\xi}) & \text{if } y = 0. \end{cases}$$

**(Case C) When  $\xi < 0$ :** Since the inverse link function (CDF) is

$$F_\xi(\theta) = \begin{cases} 1 & \text{if } \theta > -1/\xi, \\ \exp(-(1 + \xi\theta)^{-1/\xi}) & \text{if } \theta \leq -1/\xi, \end{cases}$$

we have  $F_\xi^{-1}(F_\xi(\theta)) = \min\{\theta, -1/\xi\}$ . Hence,

$$\ell_{F_\xi^{-1}}(\theta; y) = \begin{cases} \Gamma(-\xi, (1 + \xi\theta)_+^{-1/\xi}) - \min\{\theta, -1/\xi\} + \Omega(1) & \text{if } y = 1, \\ \Gamma(-\xi, (1 + \xi\theta)_+^{-1/\xi}) & \text{if } y = 0. \end{cases}$$

<sup>a</sup>This operation is the source of nonconvexity of the canonical proper loss.

## C Loss Interpretation from Bregman Divergence Perspective

In this section, we show how a gap between the Fenchel-Young loss and canonical composite loss arises. Let  $\ell_\psi$  be a canonical composite loss with a link  $\psi : [0, 1] \rightarrow \mathbb{R}$  and a proper loss  $\ell$  such that  $\nabla\psi = w$ , where  $w$  is a weight function of  $\ell$ . Let  $\ell_{\Omega_F}$  be a Fenchel-Young loss associated with a CDF  $F : \mathbb{R} \rightarrow [0, 1]$ . We specify a constraint  $F(\theta) = \psi^{-1}(\theta)$  for  $\theta \in \text{Im}(\psi)$  to see difference between  $\ell_\psi$  and  $\ell_{\Omega_F}$ . To map a real-valued prediction score  $\theta \in \mathbb{R}$  to a probability estimate  $\hat{\eta} \in [0, 1]$ , the regularized predictor  $\hat{\eta} = \hat{y}_{\Omega_F}(\theta) = F(\theta)$  and the inverse link function  $\hat{\eta} = \psi^{-1}(\theta)$  are used. Note that  $\psi^{-1}$  can only take  $\theta \in \text{Im}(\psi) = \text{supp}(F)$  as an input.

**Gap between Two Losses.** The pointwise regret of the proper loss  $\ell$  is

$$\begin{aligned} L(\hat{\eta}; \eta) - \underline{L}(\eta) &= \underbrace{\underline{L}(\hat{\eta}) + \underline{L}'(\hat{\eta})(\eta - \hat{\eta})}_{\text{by Savage's representation (Savage, 1971)}} - \underline{L}(\eta) \\ &= (-\underline{L})(\eta) - (-\underline{L})(\hat{\eta}) - (-\underline{L}')(\hat{\eta})(\eta - \hat{\eta}) \\ &= B_{-\underline{L}}(\eta || \hat{\eta}). \end{aligned}$$

On the other hand, the pointwise regret of the Fenchel-Young loss  $\ell_{\Omega_F}$  is

$$\begin{aligned} L_{\Omega_F}(\theta; \eta) - \underline{L}_{\Omega_F}(\eta) &= \ell_{\Omega_F}(\theta; \eta) \\ &= \Omega_F^*(\theta) + \Omega_F(\eta) - \theta\eta. \end{aligned}$$

By using Corollary 7, we have

$$\underline{L}(\eta) = \int_0^\eta -\psi(q) dq = \int_0^\eta -F^{-1}(q) dq \stackrel{\text{by (4)}}{=} -\Omega_F(\eta),$$

which results in the gap  $\Delta$  between the Fenchel-Young loss and canonical composite loss such that

$$\begin{aligned} \Delta &\stackrel{\text{def}}{=} \ell_{\Omega_F}(\theta; \eta) - B_{-\underline{L}}(\eta || \hat{\eta}) \\ &= \{\Omega_F^*(\theta) + \Omega_F(\eta) - \theta\eta\} - \{\Omega_F(\eta) - \Omega_F(\hat{\eta}) - \psi(\hat{\eta})(\eta - \hat{\eta})\} \\ &= \Omega_F^*(\theta) + \Omega_F(\hat{\eta}) - \theta\eta + \psi(\hat{\eta})(\eta - \hat{\eta}). \end{aligned}$$

Here, we notice that the probability estimate  $\hat{\eta}$  for the composite loss is obtained by  $\hat{\eta} = \psi^{-1}(\theta)$ , to see the gap  $\Delta$ . We divide the cases depending on a space where  $\theta$  lives in.

If  $0 < F(\theta) < 1$ , then  $\hat{\eta} = F(\theta)$  from (3) and  $\Delta = \Omega_F^*(\theta) + \Omega_F(\hat{\eta}) - \theta\hat{\eta} = 0$ , where the last identity is obtained via Danskin's theorem, that is, the Fenchel-Young gap is filled if and only if  $\hat{\eta} = \nabla\Omega_F^*(\theta) = F(\theta)$ . This is always implied by the assumption  $0 < F(\theta) < 1$ .

In contrast, if  $\underline{\theta}_F > -\infty$  and  $F(\theta) = 0$ , then  $\theta \leq \underline{\theta}_F$  (see the definition of  $\underline{\theta}_F$  in Assumption A) and  $\Delta = \Omega_F^*(\theta) + \eta(\underline{\theta}_F - \theta) = \eta(\underline{\theta}_F - \theta) \geq 0$ . The gap is filled if and only if  $\theta = \underline{\theta}_F$ , that is,  $\theta = \psi(0)$ . Note that such  $\theta$  exists for  $\psi$  with  $\inf \text{Im}(\psi) > -\infty$  (equivalently,  $\inf \text{supp}(F) > -\infty$ ). If  $\theta < \underline{\theta}_F$ , then  $\theta < \psi(0)$ , meaning that the gap  $\Delta$  is strictly larger than 0.

If  $\bar{\theta}_F < +\infty$  and  $F(\theta) = 1$ , it is confirmed in the same manner that the gap  $\Delta$  is filled if and only if  $\theta = \psi(1)$ , otherwise  $\Delta > 0$ .

To summarize, the canonical composite loss and Fenchel-Young loss is the same for  $\theta \in \text{Im}(\psi) = \text{supp}(F)$ ; otherwise, the Fenchel-Young loss is an upper bound of the canonical proper loss.

**Nonconvexity of Canonical Composite Loss.** We only confirm the nonconvexity of  $\ell_\psi(\cdot; 1)$  in the case where the support of  $F$  is bounded at the left end. The nonconvexity of  $\ell_\psi(\cdot; 0)$  can be confirmed in the same way as well. Take  $\theta_0 < \underline{\theta}_F$ ,  $\tilde{\theta} = \underline{\theta}_F$ , and  $\theta_1 = 0$ . We write  $\ell_\psi(\cdot)$  for  $\ell_\psi(\cdot; 1)$  to make notation simpler. We show that the line segment is not always above  $\ell_\psi(\cdot)$  on  $(\theta_0, \theta_1)$ . Indeed, the line through  $(\theta_0, \ell_\psi(\theta_0))$  and  $(\theta_1, \ell_\psi(\theta_1))$  is

$$\frac{\ell_\psi(\theta_0) - \ell_\psi(\theta_1)}{\theta_0 - \theta_1}(\theta - \theta_0) + \ell_\psi(\theta_0) = (\ell(0) - \ell_\psi(0)) \left( \frac{\theta}{\theta_0} - 1 \right) + \ell(0),$$

because  $\ell_\psi(\theta_0) = \ell(0)$  by the clipping of composite loss, and its value at  $\theta = \tilde{\theta}$  is  $(\ell(0) - \ell_\psi(0))(\underline{\theta}_F/\theta_0 - 1) + \ell(0) < \ell(0) = \ell_\psi(\tilde{\theta})$ . Hence, the line segment is strictly below  $\ell_\psi$  at  $\theta = \tilde{\theta}$ , meaning that  $\ell_\psi$  is nonconvex.

## D Detail of Experiments

We describe the detail of baselines used in §6 here.

- **GEV-Can** is the canonical loss of the GEV link proposed by [Agarwal et al. \(2014\)](#).
- **GEV-Log** is a composite loss of the log loss and the GEV link, which is a equivalent formulation to [Wang and Dey \(2010\)](#) with a fixed shape parameter  $\xi$ .
- **Log** is  $\ell_2$ -regularized logistic regression.
- **Platt** calibrates a classifier trained with the hinge loss with Platt’s scaling ([Platt, 1999](#)), which performs post-hoc logistic regression on outputs of the trained classifier.
- **Isotonic** calibrates a ranking function trained with the logistic loss with isotonic regression ([Menon et al., 2012](#)). For probability calibration methods (Platt, Isotonic), we split the training set into the same-sized two sets and use the former for training the base classifier and the latter for probability calibration.
- **Weight** adopts cost-sensitive logistic regression, weighting the positive class with  $1/\mathbb{P}(Y=1) - 1$  to balance the both class.
- **Bagging** is a methodology to combine the undersampling and bagging, adopted by [Wallace and Dahabreh \(2012\)](#). We undersample the majority class to balance the dataset. To reduce the variance, we take average of logistic regressors trained with different 10 subsamples.

All methods including the proposed method (**GEV-FY**) are optimized by Adam ([Kingma and Ba, 2015](#)) with batch size 256, 3,000 epochs, and the  $\ell_2$ -regularization. Both the learning rate and regularization parameter are chosen from  $\{10^{-1}, 10^{-3}, 10^{-5}\}$ . The early stopping is applied with the relative error tolerance  $1.0 \times 10^{-4}$  on training losses and 10 epochs patience. For GEV-FY, GEV-Can, GEV-Log, the shape parameter  $\xi$  is chosen from  $\{-1, -0.75, -0.5, \dots, 0.5, 0.75\}$ . Hyperparameters are chosen with the 5-fold cross validation.
